# Supplementary material for: Calcium store refilling and STIM activation in STIM- and Orai-deficient cell lines
Source: PubMed Central journal article supplement (PMC6153602; doi:10.1007/s00424-018-2165-5), 2018-06-22

## Calcium signaling, store refilling and STIM activation in CRAC-deficient mammalian cells

Sisi Zheng<sup>#1,2</sup>, Lijuan Zhou<sup>#1</sup>, Guolin Ma<sup>#3</sup>, Tian Zhang<sup>1</sup>, Jindou Liu<sup>1</sup>, Jia Li<sup>1</sup>, Nhung T. Nguyen<sup>3</sup>, Xiaoyan Zhang<sup>4</sup>, Wanjie Li<sup>4</sup>, Robert Nwokonko<sup>5</sup>, Yandong Zhou<sup>5</sup>, Fukuan Zhao<sup>2</sup>, Jingguo Liu<sup>2</sup>, Yubin Zhou<sup>\*3</sup>, Donald L. Gill<sup>\*5</sup>, Youjun Wang<sup>\*1</sup>

### Supplemental materials

#### Figure Legends:

**Supplemental Figure 1. Generation of STIM or Orai knockout (KO) HEK cell lines using CRISPR/CAS9 gene editing.** Representative sequencing results confirming disruptions of STIM or Orai genes. Top panel: raw sequencing traces; middle panel: alignments of genomic sequences; bottom panel: alignment of predicted amino acids sequences of WT and KO Orai protein around the sites of gene disruption. Red letters: mutations; blue letters: insertions; red star: early termination in translation. (A) STIM1 KO (S1KO). (B) STIM1 KO (S2KO). (C-E) Orai1/2/3 triple KO (Orai-KO). (C) Orai1 KO (O1KO). (D) Orai2 KO (O2KO). (E) Orai3 KO (O3KO).

**Supplemental Figure 2. Updated model for SOCE activation and 2-APB's effect on activated STIM1 molecules.** A) Diagram showing updated model for STIM1 activation. Upon store depletion, STIM1 dimers will release one pair of  $\text{Ca}^{2+}$  ions, and change from a folded configuration (a) to an extended one (b). The unfolded dimer will further oligomerize (c) and form clusters (e). The unfolding (a-b) and oligomerizing process (b-c) are greatly facilitated by PM association with its K-rich region. Orai1 bindings also contribute to these two steps. Oligomerized STIM1 molecules are enough to bind and activate Orai1 channels. Recruiting more STIM1 and Orai1 into junctional STIM1 punctate region may help provide "hot" spots for  $\text{Ca}^{2+}$  signaling under native conditions, but this process may not be essential for SOCE activation. B) Addition of 2-APB did not cause a reduction in the FRET signals between STIM1<sub>1-442</sub>-C/YFP pairs (blue trace) or STIM1<sub>1-491</sub>-C/YFP pairs (green trace). C) Typical traces showing the effects of 2-APB on ionomycin-induced FRET signals between PM-inserted Lyn-CFP and STIM1<sub>1-442</sub>-YFP in HEK Orai-KO cells. 2-APB can rapidly reverse the ionomycin-induced increases between Lyn-CFP and STIM1<sub>1-442</sub>-YFP, indicating the activated STIM1 molecules are reversed back to a folded conformation. D) Proposed model of 2-APB's effects on STIM1 molecules.

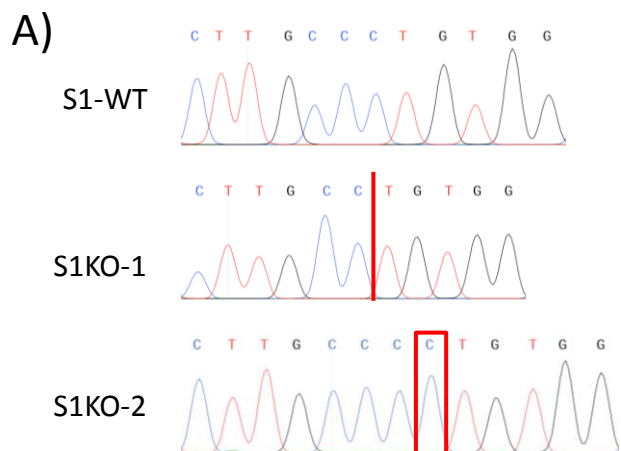

genomic sequence

S1-WT: 19 CTTGCCCTGTGG 31

S1KO-allele1: 19 CTTGCC—TGTGG 30

S1KO-allele2: 19 CTTGCCCTGTGG 32

predicted amino acid sequence

S1-WT: 8 ALWLLWGLLLHQGQSLSHSHSEK 30

S1KO-1: 8 APVAPLGTTPPAPGPEPQP\*----- 25

S1KO-2: 8 ACGSSGDSSCT.....N\*----- 73

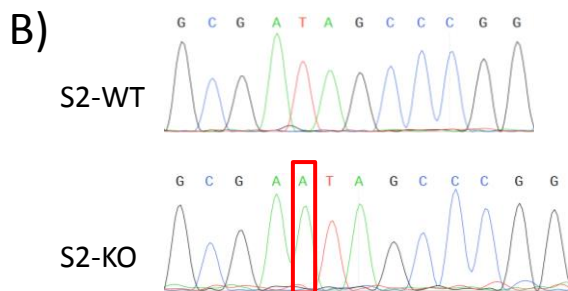

genomic sequence

S2-WT: 389 GCGA—TAGCCCGG 400

S2-KO: 389 GCGAATAGCCCGG 401

predicted amino acid sequence

S2-WT: 117 SAATAASSPAAAAGDSPALMTDPC 140

S2-KO: 117 SAATAASSPAAAAGE\*----- 131

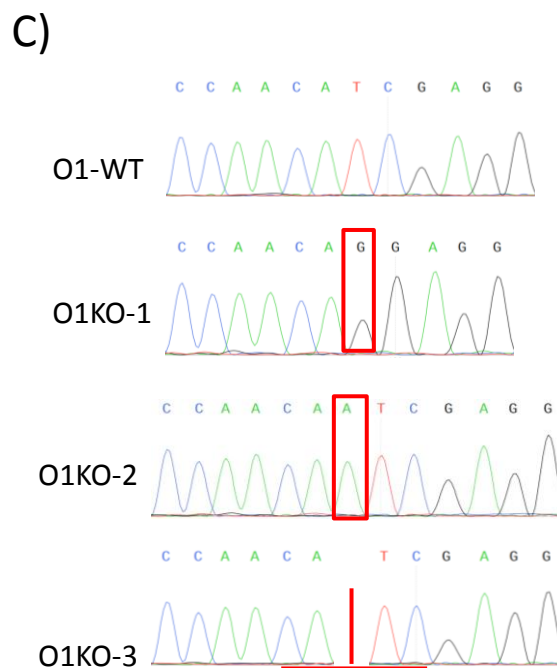

genomic sequence

O1-WT: 437 CCAACA—TCGAGG 448

O1KO-allele1: 437 CCAACAG--GAGG 447

O1KO-allele2: 437 CCAACAATCGAGG 449

O1KO-allele3: 437 CCAACA—TCGAGG 448

TGGGGACTTCCACACCTGGTTGCTGACTAATTG  
AGATGCATGCTTTCATACTTCTGCCTGCTGGG  
AGCCTGGGGACT

predicted amino acid sequence

O1-WT: 147NIEAVSNVHNLNSVKESPHE 166

O1KO-1: 147NRRR\*----- 151

O1KO-2: 147NNRGGEQRAQSQLGQGVPP\* 165

O1KO-3: 147NMGTFHTWLLTN\*----- 158

**D) Supplementary Figure 1**

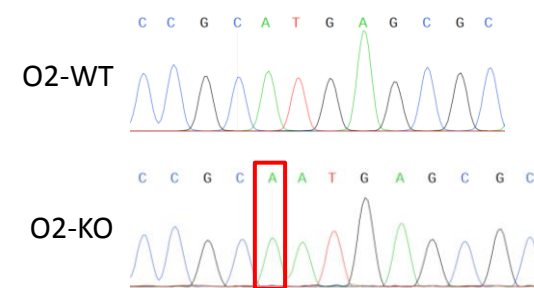

genomic sequence

O2-WT: 412 CCGC—ATGAGCGC 423

O2-KO: 412 CCGCAATGAGCGC 424

predicted amino acid sequence

O2-WT: 137 SPHERMHPYIELAWG 151

O2-KO: 137 SPQ\*----- 139

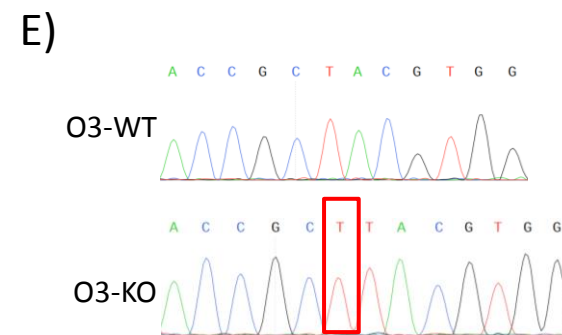

genomic sequence

O3-WT: 431 ACCGC—TAGGTGG 442

O3-KO: 431 ACCGCTTAGGTGG 443

predicted amino acid sequence

O3-WT: 145RYVELAWGFSTALGTFLLAE 165

O3-KO: 145RLRGAGLGLLHCPGHLSPC\* 164

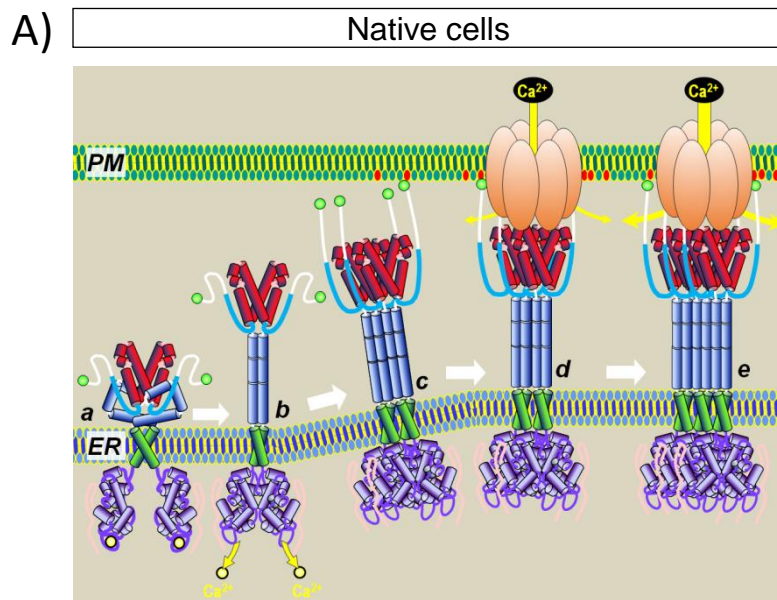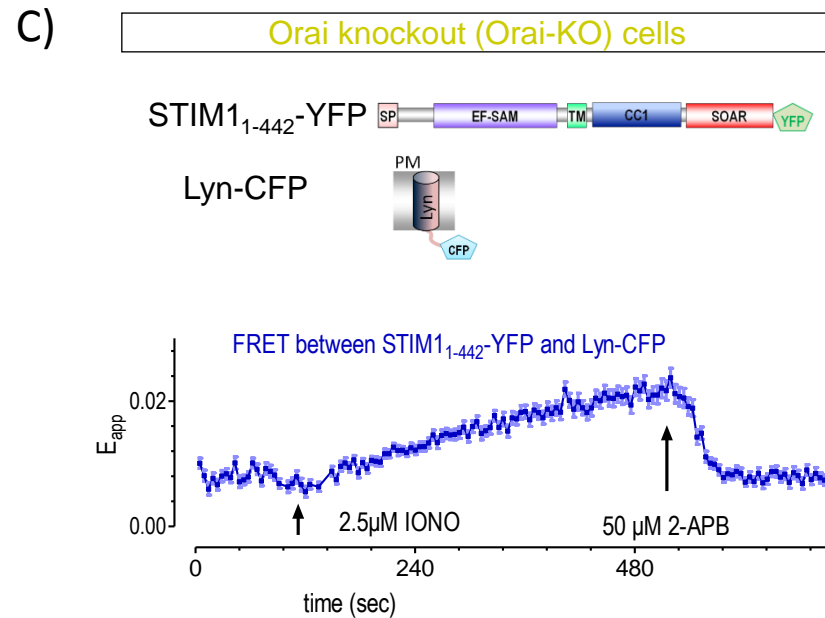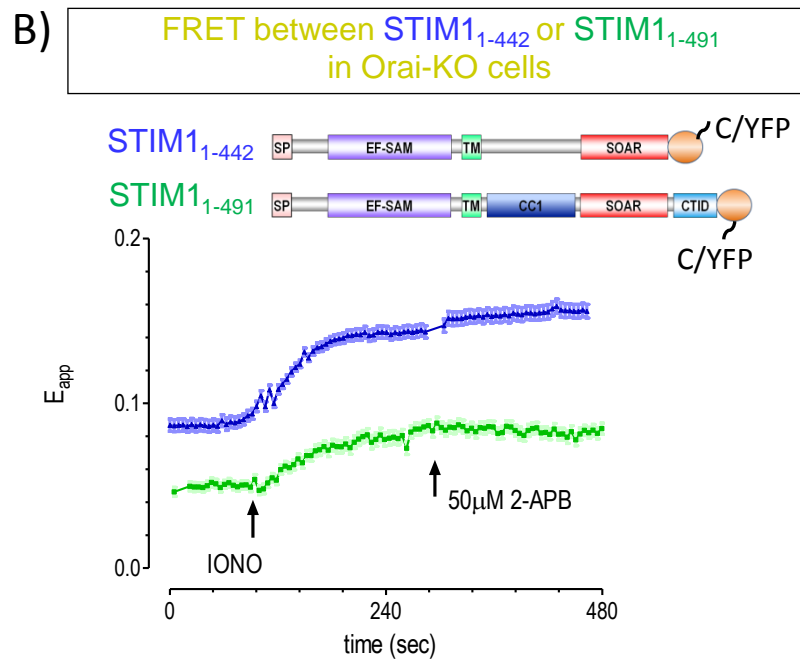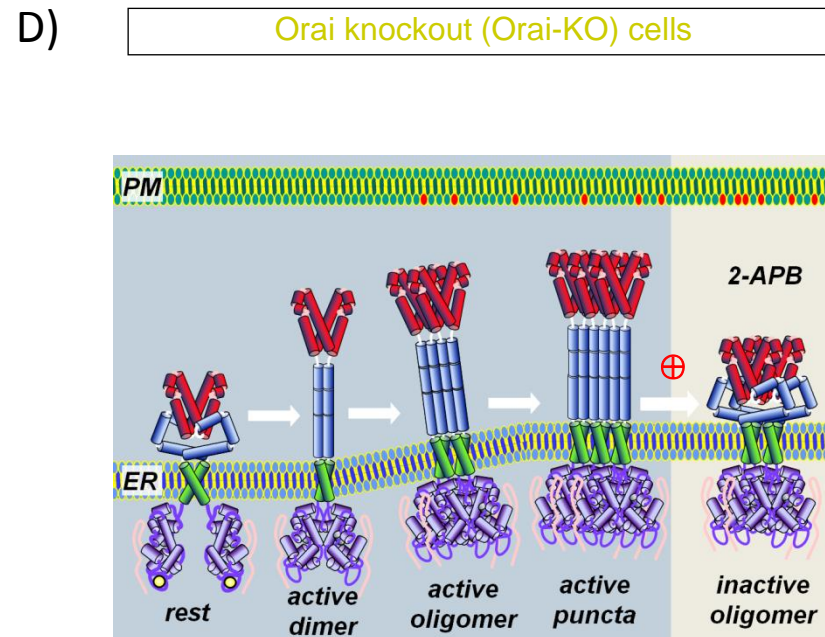

Supplement: 424_2018_2165_MOESM1_ESM.pdf [file 424_2018_2165_MOESM1_ESM.pdf]
